## Correction: Stratifying nonfunctional pituitary adenomas into two groups distinguished by macrophage subtypes

Garima Yagnik<sup>1,\*</sup>, Martin Rutkowski<sup>1,\*</sup>, Sumedh S. Shah<sup>1</sup> and Manish K. Aghi<sup>1</sup>

<sup>1</sup>Department of Neurosurgery, University of California San Francisco (UCSF), San Francisco, CA, USA

\*These authors contributed equally to this work

**Published:** July 02, 2019

**Copyright:** Yagnik et al. This is an open-access article distributed under the terms of the Creative Commons Attribution License 3.0 (CC BY 3.0), which permits unrestricted use, distribution, and reproduction in any medium, provided the original author and source are credited.

**This article has been corrected:** The proper spelling of the 2nd author's name is 'Martin Rutkowski'.

### Martin Rutkowski

Original article: Oncotarget. 2019; 10:2212–2223. <https://doi.org/10.18632/oncotarget.26775>
